# Supplementary material
Source: Elsevier journal article supplement (https://www.sciencedirect.com/science/article/pii/S2173511517301537)
Supplement: mmc4 [file S2173511517301537:mmc4.docx]

Table A.1. Reagents and instruments

| **Reagents** | **Catalog NO.** | **Manufacturers** |
| --- | --- | --- |
| Beta actin | TA-09 | ZhongShanJinQiao |
| Protein lysis buffer | P001 | YouKeZhuoTE biology |
| BCA Protein Assay Kit | 02912E | cwbiotech |
| Protein ladder | Biomed | PP2001 |
| PVDF membrane，0.45um | IPVH00010 | Millipore |
| Acrylamide | 0341 | Amresco |
| Bis-Acrylamide | 0172 | Amresco |
| Glycine | G8898 | Sigma |
| SDS | L4390 | Sigma |
| APS | Amresco | 0486 |
| MDM2 Antibody | ab3110 | abcam |
| P73 Antibody | ab40658 | abcam |
| TRIZOL | - | invitrogen |
| HiFiScript | CW2582 | Kangwei century |
| qPCR Kit Master Mix (2×) | KK4601 | KAPA Biosystems |
| TEMED | 0761 | Amresco |
| Tween-20 | 0777 | Amresco |
| Bromphenol Blue | 0449 | Amresco |
| DTT | 0281 | Amresco |
| Trizma base | T1503 | Sigma |
| Protease inhibitor cocktail | 04693116001 | Roche |
| Non-fat milk | yili | Erie |
| ECL | WBKLS0500 | Millipore |
| Methanol | 10014118 | Sinopharm |
| nacl | 10019392 | Sinopharm |
| goat anti rabbit IgG(H+L), HRP | 111-035-003 | Jackson |
| goat anti mous IgG(H+L), HRP | 115-035-003 | Jackson |
| **Instruments** | **Catalog NO.** | **Manufacturers** |
|  |  |  |
| High speed refrigerated centrifuge | - | XIANGYI |
| Multiskan Mirco-plate reader | - | Thermo |
| Mini-protean 3 Dodeca | VE180 | Tanon |
| TBC | VE186 | Tanon |
| PowerPac HC Power Supply | - | BioRad |
| PH meter | - | Sartorius |
| shaker | - | Kylin-Bell |
| homogenizer | - | Fluka |
| centrifugal | D3024R | SCILOGEX |
| Electrophoresis apparatus | JY300C | Beijing Junyi East electrophoresis instrument company |
| Gel imaging system | ChampGel 5000 | Beijing Saizhi business company |
| Spectrophotometer | SMA-1000 | Meilin hengtong |
| Q-PCR instrument | StepOne Plus | ABI company |
